# Supplementary material for: A DNA-modified hydrogel for simultaneous purification, concentration and detection of targeted cfDNA in human serum
Source: Royal Society of Chemistry journal article supplement (doi:10.1039/c8ra10138h), 2019-01-01
Supplement: c8ra10138h1.pdf [file c8ra10138h1.pdf]

# DNA Modified Hydrogel for Simultaneous Purification, Concentration and Detection of Targeted cfDNA in Human Serum

Xinglu Jiang<sup>a,c</sup>, Chenggui Zhao<sup>b,c</sup>, Xiaobo Fan<sup>a</sup>, Wei Xu<sup>a</sup>, Rui Zhang<sup>a</sup>, Hongbo Xu<sup>a</sup>,  
Guoqiu Wu<sup>\*a,b</sup>

a. Medical School of Southeast University, Nanjing 210009, People's Republic of  
China.

b. Center of Clinical Laboratory Medicine, Zhongda Hospital, Southeast University,  
Nanjing 210009, People's Republic of China.

c. These authors were equal to this week.

\*Corresponding authors. E-mail addresses: nationball@163.com

**Table S1.** DNA sequences used in this work

| Oligonucleotide |  | Sequence (5-3)                                                                    |
|-----------------|--|-----------------------------------------------------------------------------------|
| 20bp-acrydite   |  | Acrydite-gaggagccgaaaaggttcca                                                     |
| 20bp+0bp        |  | <b>tggaaccttttcggctcctc</b>                                                       |
| 20bp+10bp       |  | <b>tggaaccttttcggctcctc</b> tgccgatcca                                            |
| 20bp+20bp       |  | <b>tggaaccttttcggctcctc</b> tgccgatccatactgcggaa                                  |
| 20bp+30bp       |  | <b>tggaaccttttcggctcctc</b> tgccgatccatactgcggaatgccgatcca                        |
| 20bp+40bp       |  | <b>tggaaccttttcggctcctc</b> tgccgatccatactgcggaatgccgatccatactg<br>cgga           |
| 20bp+50bp       |  | <b>tggaaccttttcggctcctc</b> tgccgatccatactgcggaatgccgatccatactg<br>cggagttcgaactg |

**Table S2.** The primers used to amplify different lengths of dsDNAD in this work

| The   |  | Sequence (5-3)       |
|-------|--|----------------------|
| 20bp  |  | tggaaccttttcggctcctc |
| 100bp |  | aagcataaagtgtaaagcct |
| 150bp |  | taattgcgttgcgctcactg |

|       |  |                      |
|-------|--|----------------------|
| 200bp |  | cagctgcattaatgaatcgg |
| 250bp |  | tgggcgctcttccgcttct  |
| 300bp |  | ggctgcggcgagcggatca  |
|       |  |                      |

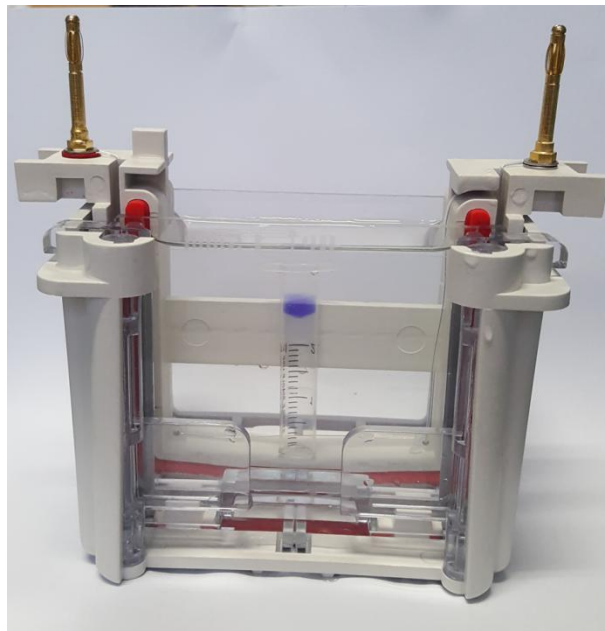

**Figure S1.** The electrophoresis apparatus of the DNA-Gel

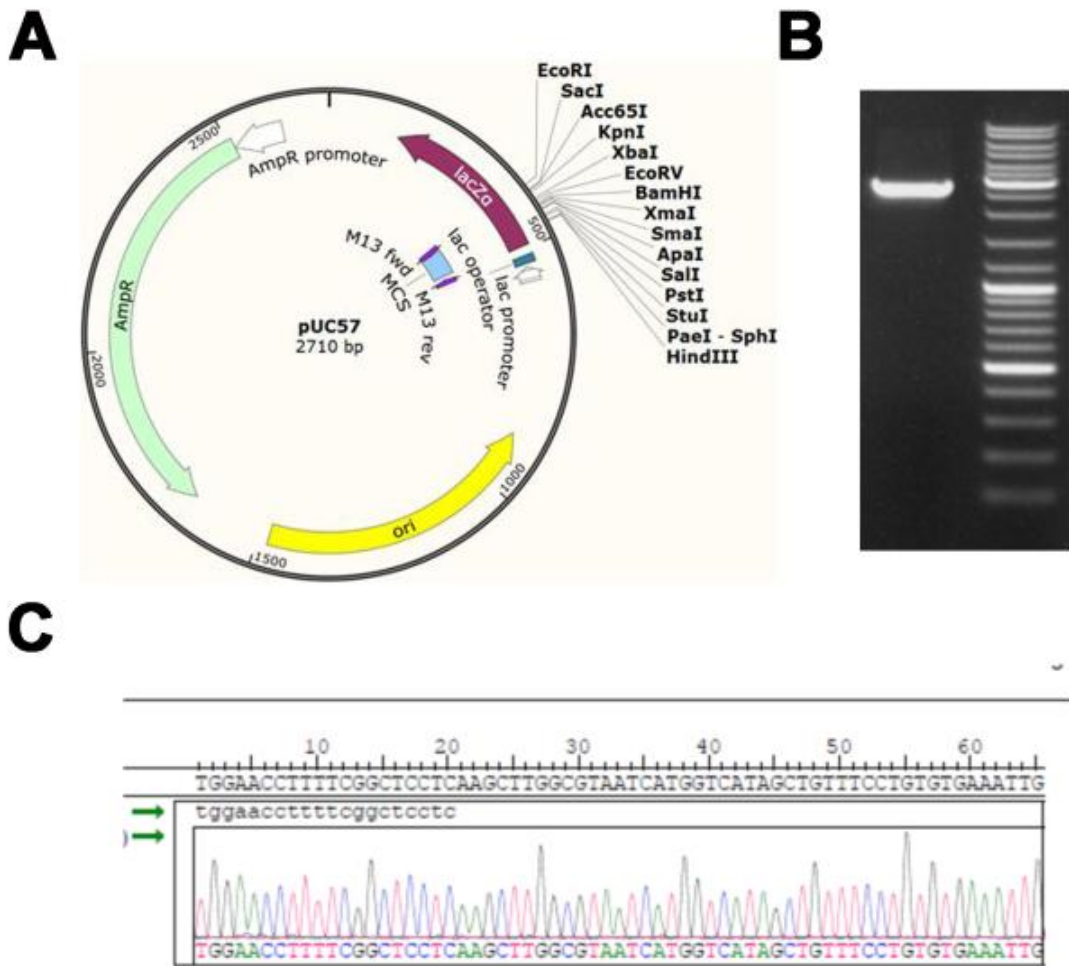

**Figure S2.** (A) the EcoRI/HindIII of pUC57; (B) the the EcoRI/HindIII of pUC57 ; (C) the sequencing analysis of pUC57

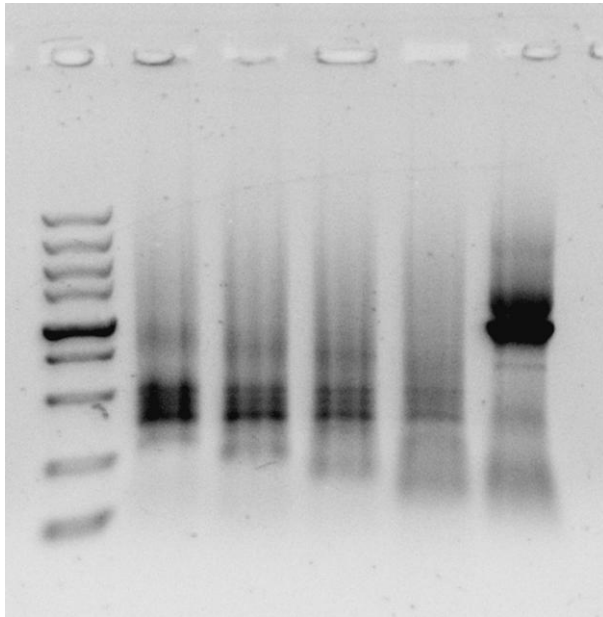

**Figure S3.** Different lengths of dsDNAD amplified by PCR; the lanes were maker, 100bp, 150bp, 200bp, 250bp and 300bp, respectively. The DNA maker band from the bottom up were 100, 250, 500, 750, 1000, 1500, 2000, 3000 and 5000 bp, respectively.
